# Supplementary material
Source: publisher figshare collection journal article supplement (https://asha.figshare.com/ndownloader/files/14145095)
Supplement: Supplementary file 1 [file 14145095]

**Supplemental Material S1.** Comparison of completers vs. noncompleters at 6 months.

| <b>Variable</b>                       | <b>Completers</b> | <b>Noncompleters</b> |                              |
|---------------------------------------|-------------------|----------------------|------------------------------|
| <b>Child Age</b>                      | 13.19 (2.86)      | 13.90 (3.04)         | $t(166) = -1.34, p = .18$    |
| <b>Child Sex</b>                      |                   |                      | $\chi^2(1) = 0.00, p = 1.00$ |
| Male                                  | 95                | 29                   |                              |
| Female                                | 34                | 10                   |                              |
| <b>Child Race<sup>a</sup></b>         |                   |                      | $\chi^2(1) = 1.18, p = .28$  |
| Non-White                             | 21                | 10                   |                              |
| White                                 | 108               | 29                   |                              |
| <b>Child TBI Severity<sup>a</sup></b> |                   |                      | $\chi^2(2) = 1.08, p = .58$  |
| Complicated-Mild                      | 93                | 28                   |                              |
| Moderate                              | 31                | 8                    |                              |
| Severe                                | 5                 | 3                    |                              |
| <b>Parent Education<sup>a</sup></b>   |                   |                      | $\chi^2(2) = 1.60, p = .45$  |
| High school/GED or less               | 64                | 17                   |                              |
| 4-year College degree or less         | 15                | 2                    |                              |
| Graduate Degree                       | 43                | 15                   |                              |
| <b>Parent Income<sup>a</sup></b>      |                   |                      | $\chi^2(2) = 1.36, p = .51$  |
| \$34,999 or less                      | 31                | 11                   |                              |
| \$35,000-\$99,999                     | 50                | 12                   |                              |
| \$100,000 or more                     | 36                | 7                    |                              |

<sup>a</sup>Due to low cell counts, categories were collapsed (except for TBI severity); if any remaining cell counts were less than 5,  $p$  values were also computed using Monte Carlo simulation (10000 replications). All simulated  $p$  values were in agreement with those using the standard calculation.
